# Supplementary material for: A multiple regression model framework for designing a UVC LED reactor for point-of-use water treatment
Source: Royal Society of Chemistry journal article supplement (doi:10.1039/d1ew00215e), 2021-01-01
Supplement: d1ew00215e1.pdf [file d1ew00215e1.pdf]

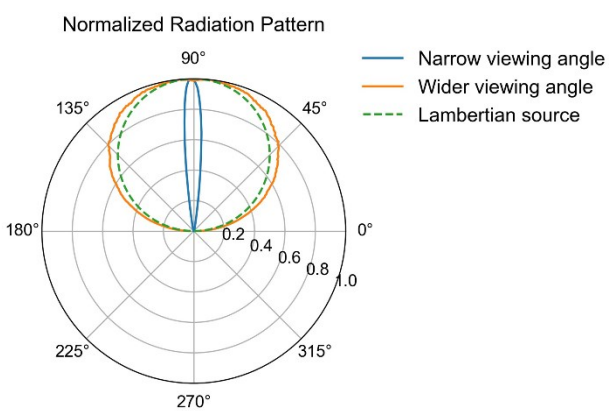

Fig. S1 Normalized radiation patterns of UVC LED.

**Supplemental Fig. S1**

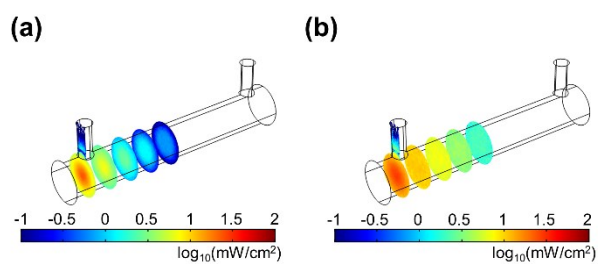

Fig. S2 (a) Fluence rate  $E'$  at 10, 20, 30, 40 and 50 mm transverse plane within reactor for water UVT = 50%/cm; (b) Fluence rate  $E'$  at 10, 20, 30, 40 and 50 mm transverse plane within reactor for water UVT = 90%/cm.

**Supplemental Fig. S2**

Supplemental Fig. S3

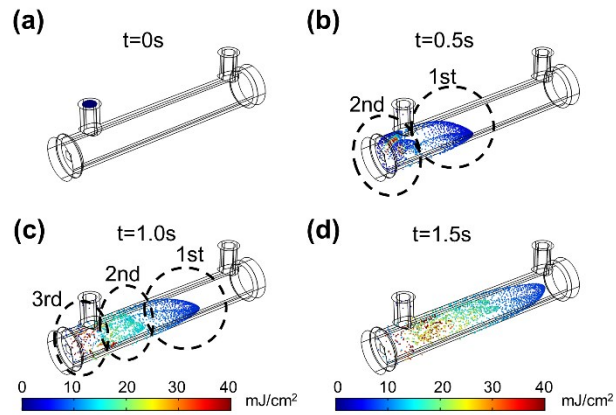

Fig. S3 Multiphysics modeling of particle tracing at time (a)  $t = 0$ , (b)  $t = 0.5$  s, (c)  $t = 1.0$  s, (d)  $t = 1.5$  s with color representing UV fluence each particle received. Three particle populations behave distinctively are highlighted at  $t = 0.5$  s and  $1.0$  s.

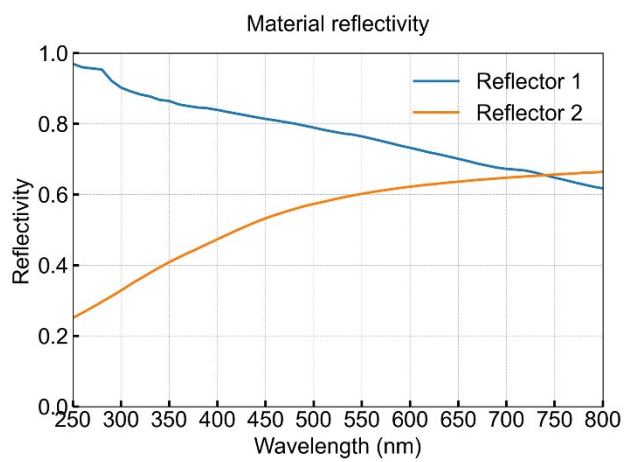

Fig. S4 Reflectivity measurement from 250nm to 800nm for diffuse (Reflector 1) and specular (Reflector 2) reflective materials.

**Supplemental Fig. S4**

## Supplemental Fig. S5

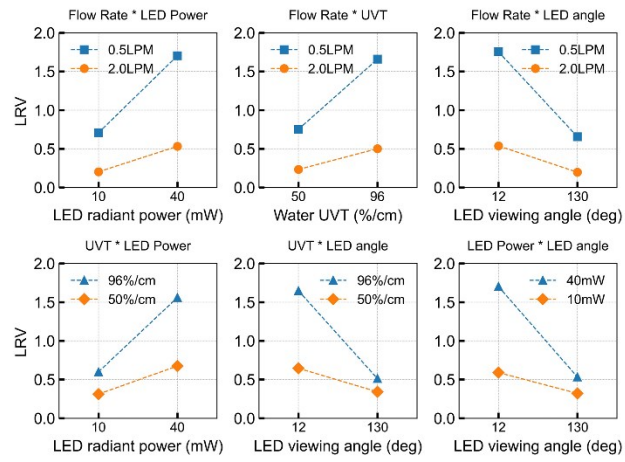

Fig. S5 Two-way interaction plots.

Supplemental Fig. S6

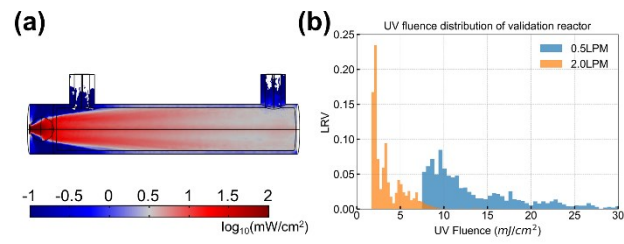

Fig. S6 (a) UV fluence rate of a validation reactor; (b) UV fluence of the validation reactor at flow rate of 0.5 and 2.0 LPM.

**Supplemental Table S1**

**Table S1.** Effect of UVC LED reactor design and operational variables and three-way interactions

| Determinant                                       | Symbol      | Effect  | Coefficient ( $\alpha_i$ ) | p-value |
|---------------------------------------------------|-------------|---------|----------------------------|---------|
| Flow rate                                         | $x_0$       | -0.8377 | -3.36                      | < 0.001 |
| UVT                                               | $x_1$       | 0.5867  | 1.485                      | < 0.001 |
| Reflector reflectivity                            | $x_2$       | -0.1910 | 0.1784                     | 0.002   |
| LED radiant power                                 | $x_3$       | 0.6624  | -0.147                     | < 0.001 |
| LED viewing angle                                 | $x_4$       | -0.7192 | 0.0115                     | < 0.001 |
| LED wavelength                                    | $x_5$       | -0.2508 | -0.0387                    | < 0.001 |
| Flow rate × UVT                                   | $x_{0,1}$   | -0.3184 | -0.991                     | < 0.001 |
| Flow rate × LED radiant power                     | $x_{0,3}$   | -0.3330 | 0.0058                     | < 0.001 |
| Flow rate × LED viewing angle                     | $x_{0,4}$   | 0.3786  | -0.0085                    | < 0.001 |
| Flow rate × LED wavelength                        | $x_{0,5}$   | 0.1283  | 0.0143                     | 0.033   |
| UVT × Reflector reflectivity                      | $x_{1,2}$   | -0.1726 | -0.375                     | 0.005   |
| UVT × LED radiant power                           | $x_{1,3}$   | 0.2990  | 0.1220                     | < 0.001 |
| UVT × LED viewing angle                           | $x_{1,4}$   | -0.4158 | -0.0151                    | < 0.001 |
| LED radiant power × LED viewing angle             | $x_{3,4}$   | -0.4502 | -0.00005                   | < 0.001 |
| Flow rate × UVT × LED radiant power               | $x_{0,1,3}$ | -0.1545 | -0.0299                    | 0.011   |
| Flow rate × UVT × LED viewing angle               | $x_{0,1,4}$ | 0.2335  | 0.0115                     | < 0.001 |
| Flow rate × LED radiant power × LED viewing angle | $x_{0,3,4}$ | 0.2348  | 0.000177                   | < 0.001 |
| UVT × LED radiant power × LED viewing angle       | $x_{1,3,4}$ | -0.2371 | -0.000582                  | < 0.001 |

UVT = Ultraviolet Transmittance,

$$LRV = 9.96 + \sum_{i=0}^5 \alpha_i x_i + \sum_{i=1,3,4,5} \alpha_{0,i} x_{0,i} + \sum_{i=2,3,4} \alpha_{1,i} x_{1,i} + \alpha_{3,4} x_{3,4} + \sum_{i=3,4} \alpha_{0,1,i} x_{0,1,i} + \sum_{i=0,1} \alpha_{i,3,4} x_{i,3,4}$$
